# Supplementary material for: Social stress induces autoimmune responses against the brain
Source: PubMed Central journal article supplement (PMC10710076; doi:10.1073/pnas.2305778120), 2023-11-27
Supplement: pnas.2305778120.sapp.pdf [file pnas.2305778120.sapp.pdf]

## **Supporting Information for** Social stress induces autoimmune responses against the brain

Yusuke Shimo, Flurin Cathomas, Hsiao-yun Lin, Kenny L. Chan, Lyonna F. Parise, Long Li, Carmen Ferrer-Pérez, Samer Muhareb, Sara Costi, James W. Murrough, and Scott J. Russo

Corresponding author: Scott J. Russo  
Email: [scott.russo@mssm.edu](mailto:scott.russo@mssm.edu)

### **This PDF file includes:**

Figures S1 to S8  
Tables S1 and S2

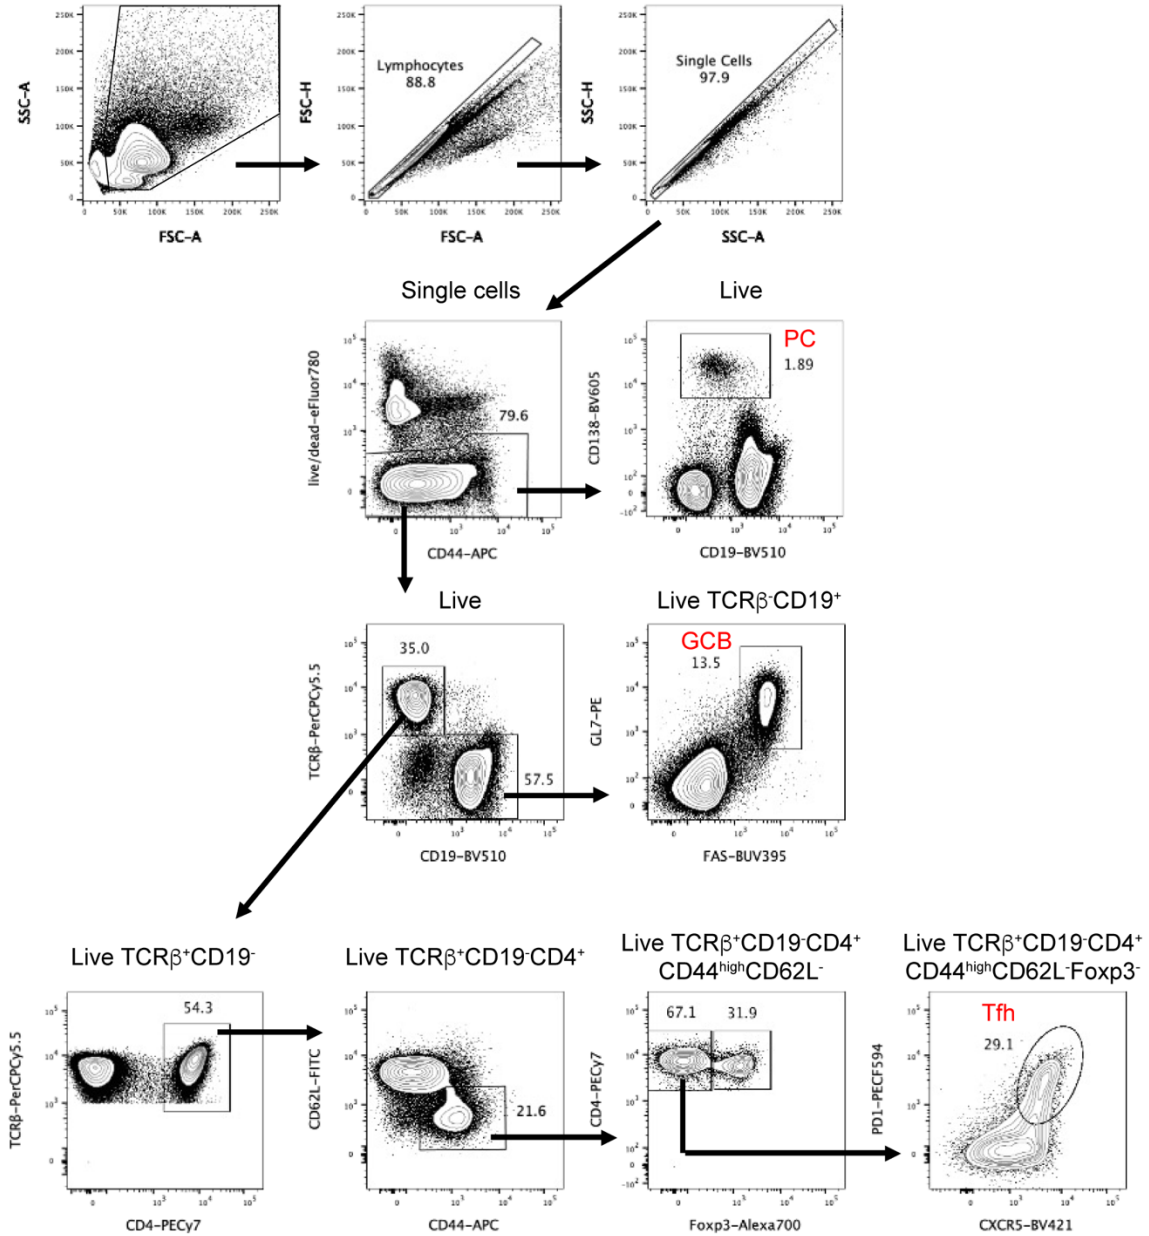

**Fig. S1. Gating strategy of the flow cytometric analysis of germinal center B cells (GCB), follicular helper T cells (Tfh), and plasma cells (PC).** Percentages of immune cell populations were analyzed as described: GCB: GL7<sup>+</sup>FAS<sup>+</sup> in live CD19<sup>+</sup>TCRβ<sup>-</sup> cells; Tfh: CXCR5<sup>high</sup>PD1<sup>high</sup> in live TCRβ<sup>+</sup>CD19<sup>-</sup>CD4<sup>+</sup>CD44<sup>high</sup>CD62L<sup>-</sup>Foxp3<sup>-</sup> cells; PC: CD138<sup>+</sup> in live cells.

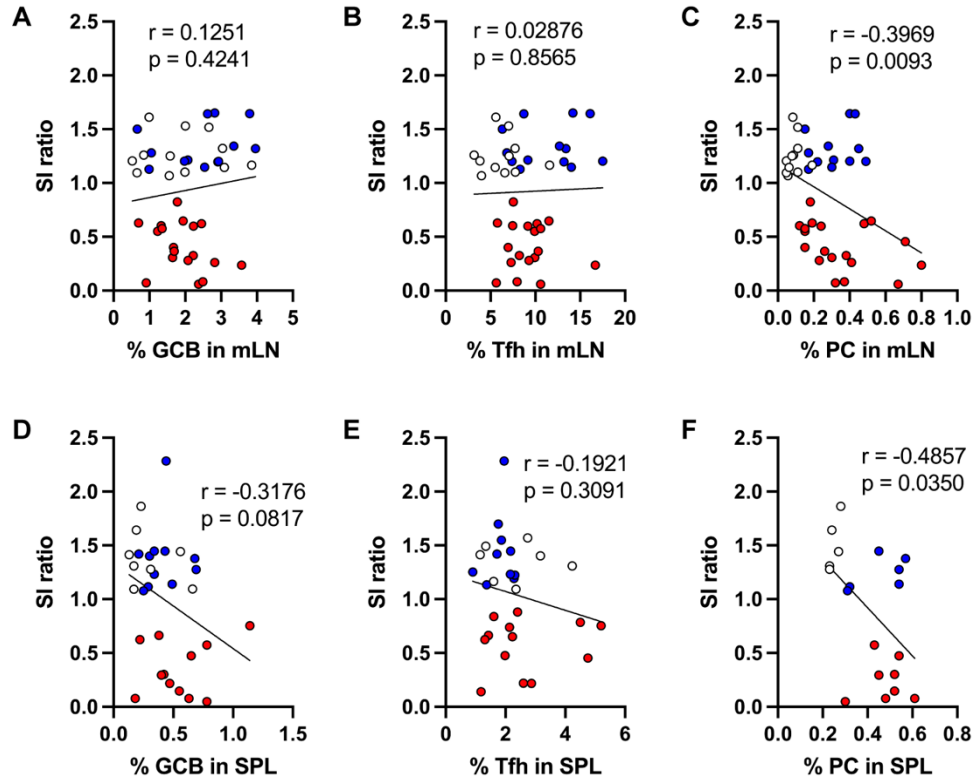

**Fig. S2. Correlations between social behavior and immune cell populations in mesenteric lymph nodes (mLN) and spleen (SPL) from unstressed control (CON), stress-susceptible (SUS), and stress-resilient (RES) mice.** Correlations between social interaction (SI) ratio and percentages of (A) germinal center B cells (GCB) (CON:  $n = 12$ , SUS:  $n = 18$ , RES:  $n = 13$ ,  $r = 0.1251$ ,  $P = 0.4241$ ), (B) follicular helper T cells (Tfh) (CON:  $n = 11$ , SUS:  $n = 18$ , RES:  $n = 13$ ,  $r = 0.02876$ ,  $P = 0.8565$ ), and (C) plasma cells (PC) (CON:  $n = 11$ , SUS:  $n = 19$ , RES:  $n = 12$ ,  $r = -0.3969$ ,  $P = 0.0093$ ) in mLN. Correlations between SI ratio and percentages of (D) GCB (CON:  $n = 8$ , SUS:  $n = 12$ , RES:  $n = 11$ ,  $r = -0.3176$ ,  $P = 0.0817$ ), (E) Tfh (CON:  $n = 7$ , SUS:  $n = 13$ , RES:  $n = 10$ ,  $r = -0.1921$ ,  $P = 0.3091$ ), and (F) PC (CON:  $n = 5$ , SUS:  $n = 8$ , RES:  $n = 6$ ,  $r = -0.4857$ ,  $P = 0.0350$ ) in SPL. Color: white = CON, red = SUS, blue = RES. Correlations were evaluated by Pearson correlation analysis. The  $P$  value threshold adjusted to  $P < 0.016$  (A-F).

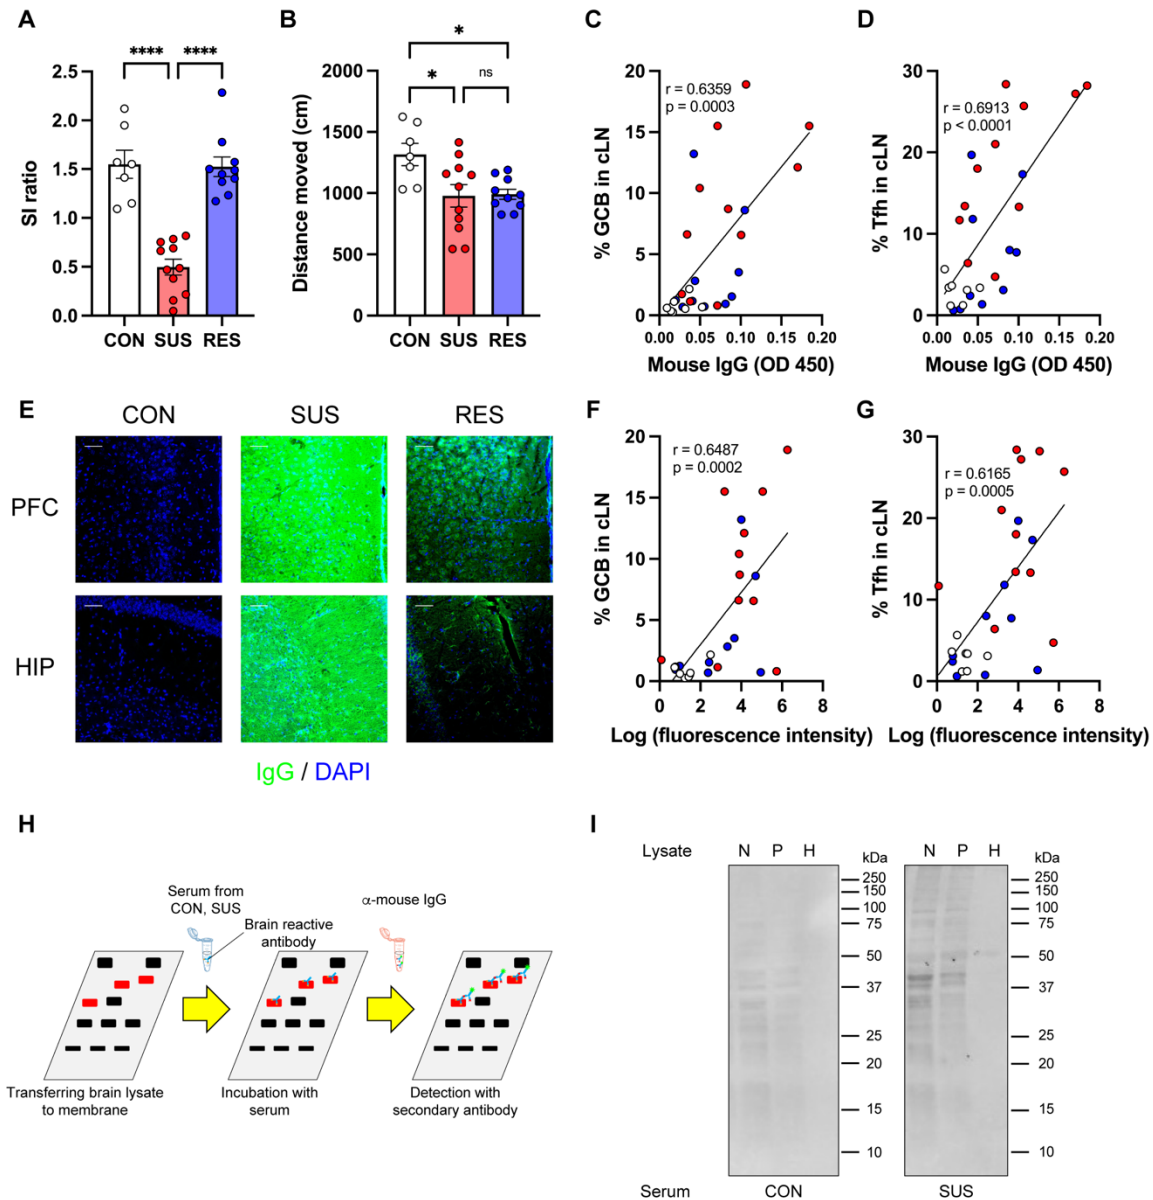

**Fig. S3. Analysis of brain-reactive serum antibodies, and correlations with immune cell populations in cervical lymph nodes (cLN), and brain-reactive IgG antibodies in sera.** (A) Social interaction (SI) ratio of unstressed control (CON), stress-susceptible (SUS), and stress-resilient (RES) mice (CON:  $n = 7$ , SUS:  $n = 11$ , RES:  $n = 10$ ,  $F(2, 25) = 35.99$ ,  $P < 0.0001$ ). (B) Distance moved during the SI test (no target) (CON:  $n = 7$ , SUS:  $n = 11$ , RES:  $n = 10$ ,  $F(2, 25) = 5.111$ ,  $P = 0.0138$ ). (C and D) Correlation between levels of brain lysate-reactive serum IgG antibodies and percentages of (C) germinal center B cells (GCB) (CON:  $n = 7$ , SUS:  $n = 11$ , RES:  $n = 10$ ,  $r = 0.6359$ ,  $P = 0.0003$ ), (D) follicular helper T cells (Tfh) (CON:  $n = 7$ , SUS:  $n = 11$ , RES:  $n = 10$ ,  $r = 0.6913$ ,  $P < 0.0001$ ). (E) Staining of brain sections around the prefrontal cortex (PFC) and hippocampus (HIP) from immune-deficient *Rag2<sup>-/-</sup>* mice with sera from CON, SUS, and RES mice (green: IgG, blue: DAPI, scale bar: 50  $\mu$ m). (F and G) Correlation between fluorescence intensity of brain sections stained with sera and percentages of (F) GCB (CON:  $n = 7$ , SUS:  $n = 11$ , RES:  $n = 10$ ,  $r = 0.6487$ ,  $P = 0.0002$ ), (G) Tfh (CON:  $n = 7$ , SUS:  $n = 11$ , RES:  $n = 10$ ,  $r = 0.6165$ ,  $P = 0.0005$ ). (H) Schematic for detecting brain-reactive IgG antibodies in sera by Western blotting. (I) Specific bands detected on a membrane with brain lysates from the nucleus accumbens (N), prefrontal cortex (P), and hippocampus (H) incubated with serum from a SUS

mouse. Numbers in the figure indicate protein size (kDa). Data represented as mean  $\pm$  standard error of the mean were analyzed by one-way ANOVA with Bonferroni post hoc test (\* $P < 0.05$ , \*\*\*\* $P < 0.0001$ , ns: not significant). Correlations were evaluated by Pearson correlation analysis. The  $P$  value threshold adjusted to  $P < 0.025$  (C, D, F, and G).

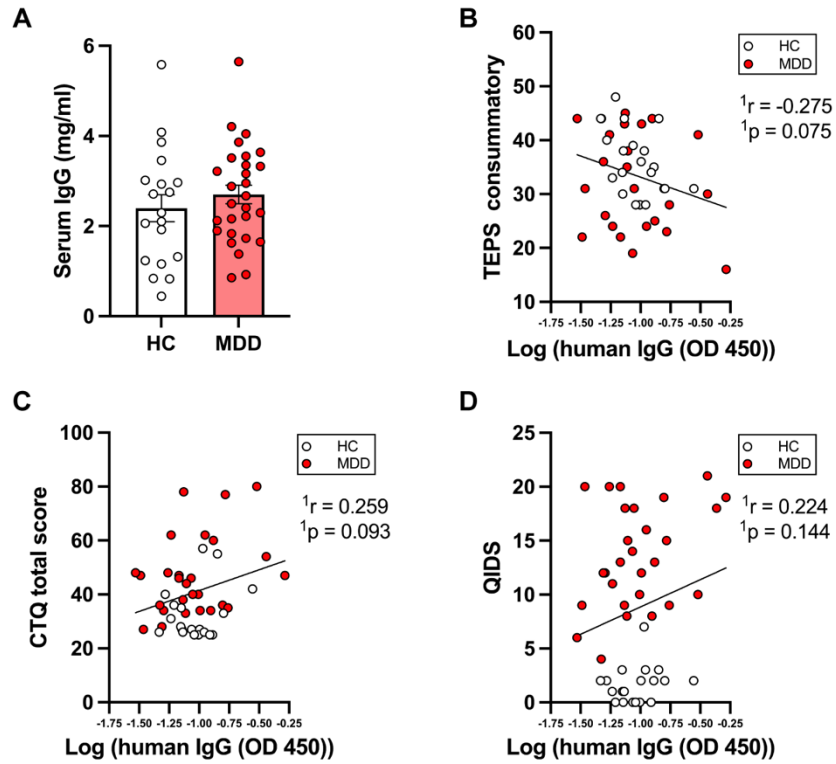

**Fig. S4. Analyses of serum IgG concentrations and correlation between levels of brain-reactive serum IgG antibodies and clinical outcomes.** (A) Total IgG antibody concentrations in sera from healthy controls (HC) and patients with major depressive disorder (MDD) (HC:  $n = 19$ , MDD:  $n = 28$ ,  $t(45) = 0.8614$ ,  $P = 0.3936$ ). (B) Correlation between levels of brain lysate-reactive IgG antibodies in sera and the Temporal Experience of Pleasure Scale (TEPS) consummatory (HC:  $n = 19$ , MDD:  $n = 27$ ,  $^1r = -0.275$ ,  $^1P = 0.075$ ). (C) Correlation between levels of brain lysate-reactive IgG antibodies in sera and the Childhood Trauma Questionnaire (CTQ) total score (HC:  $n = 19$ , MDD:  $n = 27$ ,  $^1r = 0.259$ ,  $^1P = 0.093$ ). (D) Correlation between levels of brain lysate-reactive IgG antibodies in sera and the Quick Inventory of Depressive Symptomatology (QIDS) (HC:  $n = 19$ , MDD:  $n = 28$ ,  $^1r = 0.224$ ,  $^1P = 0.144$ ). The  $P$  value threshold adjusted to  $P < 0.0125$  (B, C, and D). Data represented as mean  $\pm$  standard error of the mean were analyzed by unpaired t-test.  $^1$ The partial correlation was calculated to control for the potential confounding variables of age, gender, and body mass index (BMI).

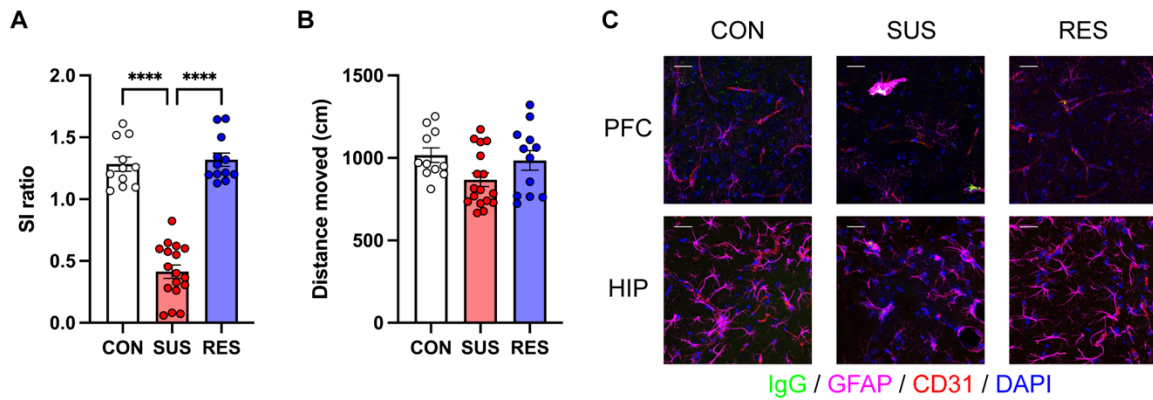

**Fig. S5. Behaviors and representative brain section images for analyses of IgG antibodies in the brain from unstressed control (CON), stress-susceptible (SUS), and stress-resilient (RES) mice.** (A) Social interaction (SI) ratio (CON:  $n = 11$ , SUS:  $n = 17$ , RES:  $n = 12$ ,  $F(2, 37) = 93.46$ ,  $P < 0.0001$ ). (B) Distance moved during the SI test (no target) (CON:  $n = 11$ , SUS:  $n = 17$ , RES:  $n = 12$ ,  $F(2, 37) = 2.876$ ,  $P = 0.0691$ ). (C) Staining of IgG antibodies in brain sections of prefrontal cortex (PFC), and hippocampus (HIP) from CON, SUS, and RES mice (green: IgG, magenta: GFAP, red: CD31, blue: DAPI, scale bar:  $25 \mu\text{m}$ ). Data represented as mean  $\pm$  standard error of the mean were analyzed by one-way ANOVA with Bonferroni post hoc test ( $****P < 0.0001$ ).

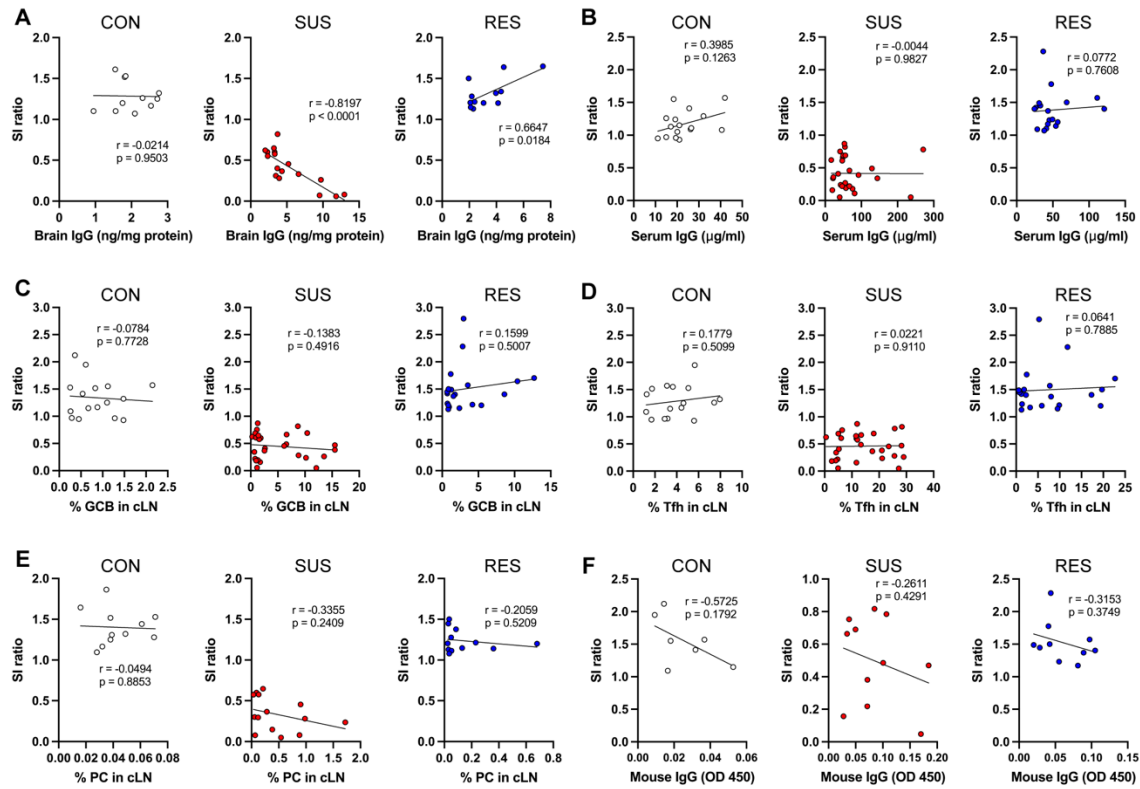

**Fig. S6. Correlations between social behavior and immune parameters for each group.** Correlations between social interaction (SI) ratio and (A) IgG concentrations in the brain (CON:  $n = 11$ ,  $r = -0.0214$ ,  $P = 0.9503$ , SUS:  $n = 17$ ,  $r = -0.8197$ ,  $P < 0.0001$ , RES:  $n = 12$ ,  $r = 0.6647$ ,  $P = 0.0184$ ), (B) serum IgG concentrations (CON:  $n = 16$ ,  $r = 0.3985$ ,  $P = 0.1263$ , SUS:  $n = 27$ ,  $r = -0.0044$ ,  $P = 0.9827$ , RES:  $n = 18$ ,  $r = 0.0772$ ,  $P = 0.7608$ ), (C) percentages of germinal center B cells (GCB) in cervical lymph nodes (cLN) (CON:  $n = 16$ ,  $r = 0.0784$ ,  $P = 0.7728$ , SUS:  $n = 27$ ,  $r = -0.1383$ ,  $P = 0.4916$ , RES:  $n = 20$ ,  $r = 0.1599$ ,  $P = 0.5007$ ), (D) percentages of follicular helper T cells (Tfh) in cLN (CON:  $n = 16$ ,  $r = 0.1779$ ,  $P = 0.5099$ , SUS:  $n = 28$ ,  $r = 0.0221$ ,  $P = 0.9110$ , RES:  $n = 20$ ,  $r = 0.0641$ ,  $P = 0.7885$ ), (E) percentages of plasma cells (PC) in cLN (CON:  $n = 11$ ,  $r = -0.0494$ ,  $P = 0.8853$ , SUS:  $n = 14$ ,  $r = -0.3355$ ,  $P = 0.2409$ , RES:  $n = 12$ ,  $r = -0.2059$ ,  $P = 0.5209$ ), (F) brain-reactive serum IgG levels analyzed by enzyme-linked immunosorbent assay (CON:  $n = 7$ ,  $r = -0.5725$ ,  $P = 0.1792$ , SUS:  $n = 11$ ,  $r = -0.2611$ ,  $P = 0.4291$ , RES:  $n = 10$ ,  $r = -0.3153$ ,  $P = 0.3749$ ). Correlations were evaluated by Pearson correlation analysis. The  $P$  value threshold adjusted to  $P < 0.016$  (C, D, and E).



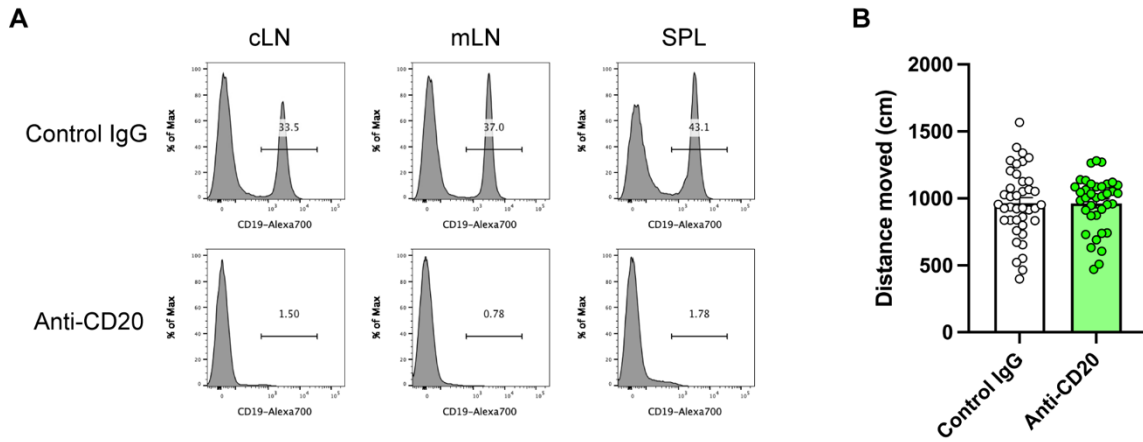

**Fig. S7. Analyses of B cells in different lymphoid organs and behaviors in B cell depletion experiments.** (A) Percentages of B cells in cervical lymph nodes (cLN), mesenteric lymph nodes (mLN), and spleen (SPL) 7 days after control IgG or anti-CD20 antibody treatments. (B) Distance moved during the social interaction (SI) test (no target) (Control IgG:  $n = 40$ , Anti-CD20:  $n = 37$ ,  $t(75) = 0.03703$ ,  $P = 0.9706$ ). Data represented as mean  $\pm$  standard error of the mean were analyzed by unpaired t-test.

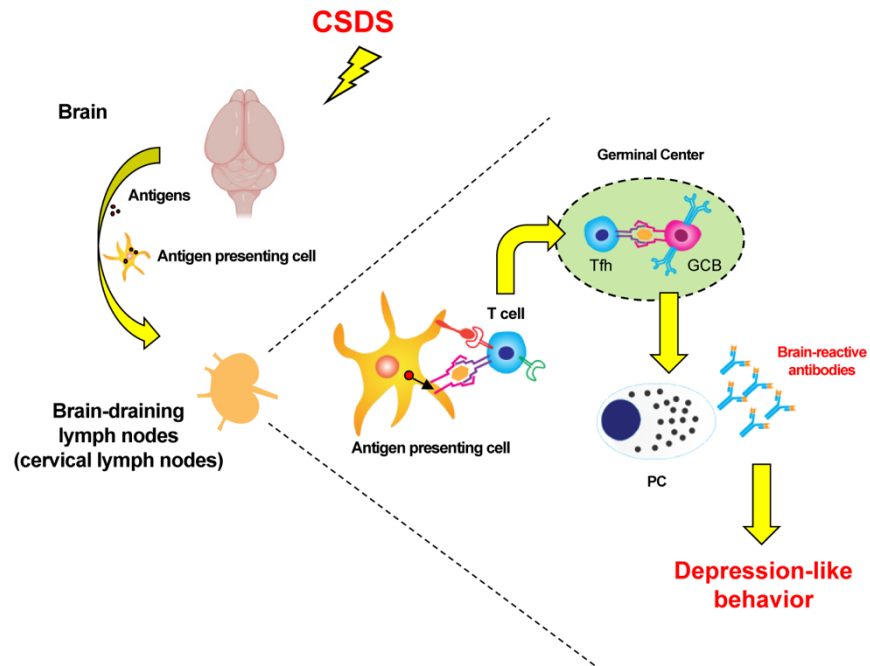

**Fig. S8. Mechanisms of chronic social defeat stress (CSDS)-induced depression-like behavior mediated by production of autoantibodies against the brain.** CSDS induces activation of the germinal center reaction preferentially in brain-draining lymph nodes, leading to production of brain-reactive antibodies. Increases in immune cell populations, such as germinal center B cells (GCB), follicular helper T cells (Tfh), and plasma cells (PC) in cervical lymph nodes are associated with low sociability in stressed mice. Furthermore, elevation of IgG antibody concentrations in the brain and brain-reactive antibody concentrations in sera correlate with depression-like behavior, which was dependent on the presence of B cells.

**Table S1. List of antibodies used in this study.**

| Antibodies                                         | Clone      | Label                    | Supplier               | Cat. No.    | Dilution | Application                |
|----------------------------------------------------|------------|--------------------------|------------------------|-------------|----------|----------------------------|
| CD16/32                                            | 2.4G2      | -                        | Bio X Cell             | BE0307      | 1:200    | FCM                        |
| TCR $\beta$                                        | H57-597    | PerCPy5.5                | eBioscience            | 45-5961-80  | 1:400    | FCM                        |
| PD1                                                | J43        | PECF594                  | BD Bioscience          | 562523      | 1:400    | FCM                        |
| CXCR5                                              | L138D7     | BV421                    | Biolegend              | 145511      | 1:200    | FCM                        |
| CD19                                               | 6D5        | BV510                    | Biolegend              | 115545      | 1:200    | FCM                        |
| CD19                                               | 6D5        | Alexa700                 | Biolegend              | 115527      | 1:200    | FCM                        |
| CD44                                               | IM7        | APC                      | BD Bioscience          | 561862      | 1:400    | FCM                        |
| CD62L                                              | MEL-14     | FITC                     | BD Bioscience          | 553150      | 1:400    | FCM                        |
| CD4                                                | RM4-5      | PECy7                    | BD Bioscience          | 561099      | 1:400    | FCM                        |
| GL7                                                | GL7        | PE                       | Biolegend              | 144607      | 1:200    | FCM                        |
| FAS                                                | Jo2        | BUV395                   | BD Bioscience          | 740254      | 1:200    | FCM                        |
| CD138                                              | 281-2      | BV605                    | BD Bioscience          | 563147      | 1:200    | FCM                        |
| Foxp3                                              | Fjk-16s    | Alexa700                 | eBioscience            | 56-5773-82  | 1:200    | FCM                        |
| CD31                                               | MEC13.3    | -                        | Biolegend              | 102501      | 1:400    | IHC                        |
| GFAP                                               | polyclonal | -                        | Dako                   | IS524       | 1:1      | IHC                        |
| Donkey Anti-Mouse IgG (H+L)                        | polyclonal | Cy2                      | Jackson ImmunoResearch | 715-225-150 | 1:300    | IHC                        |
| Donkey Anti-Mouse IgG (H+L)                        | polyclonal | Cy3                      | Jackson ImmunoResearch | 715-165-150 | 1:300    | IHC                        |
| Donkey Anti-Rabbit IgG (H+L)                       | polyclonal | Cy5                      | Jackson ImmunoResearch | 711-175-152 | 1:300    | IHC                        |
| Donkey Anti-Rat IgG (H+L)                          | polyclonal | Cy2                      | Jackson ImmunoResearch | 712-225-153 | 1:300    | IHC                        |
| Donkey Anti-Rat IgG (H+L)                          | polyclonal | Cy3                      | Jackson ImmunoResearch | 712-165-153 | 1:300    | IHC                        |
| Donkey Anti-Goat IgG (H+L)                         | polyclonal | Cy5                      | Jackson ImmunoResearch | 705-175-147 | 1:300    | IHC                        |
| Purified Rat IgG2b, $\kappa$ Isotype Ctrl Antibody | RTK4530    | -                        | Biolegend              | 400671      | -        | B cell depletion (Control) |
| Purified anti-mouse CD20 Antibody                  | SA271G2    | -                        | Biolegend              | 152104      | -        | B cell depletion           |
| Donkey anti-Mouse IgG (H+L) Secondary Antibody     | polyclonal | IRDye <sup>®</sup> 800CW | LI-COR                 | 926-32212   | 1:5000   | Western blotting           |

Abbreviations: FCM: Flow cytometry, IHC: Immunohistochemistry

**Table S2. List of reagents used in this study.**

| Reagents                                               | Supplier                     | Cat. No.    | Application              |
|--------------------------------------------------------|------------------------------|-------------|--------------------------|
| BD Pharm Lyse                                          | BD Bioscience                | 555899      | Red blood cell lysis     |
| Fixable Viability Dye eFluor®780                       | eBioscience                  | 65-0865-14  | FCM                      |
| True-Nuclear™ Transcription Factor Buffer Set          | Biolegend                    | 424401      | FCM                      |
| Super Bright Complete Staining Buffer                  | eBioscience                  | SB-4401-42  | FCM                      |
| DPBS                                                   | gibco                        | 14190-144   | FCM                      |
| UltraPure™ 0.5M EDTA                                   | gibco                        | 15575-038   | FCM                      |
| Bovine Serum Albumin                                   | sigma                        | A9647-100G  | FCM                      |
| DAPI                                                   | molecular probes             | D1306       | IHC                      |
| Normal Donkey Serum                                    | Jackson Immunoresearch       | 017-000-121 | IHC                      |
| DEPEX Mounting medium                                  | Electron Microscopy Sciences | 13514       | IHC                      |
| TritonX-100                                            | sigma                        | T8787-100ML | IHC                      |
| 20% Paraformaldehyde (formaldehyde) aqueous solution   | Electron Microscopy Sciences | 15713-S     | IHC                      |
| 1XTBS                                                  | Fisher                       | BP24721     | Brain lysate preparation |
| cOmplete™, Mini, EDTA-free Protease Inhibitor Cocktail | Roche                        | 11836170001 | Brain lysate preparation |
| BCA Protein Assay Kit                                  | Pierce                       | 23227       | Brain lysate preparation |
| IgG (Total) Mouse Uncoated ELISA Kit with Plates       | Thermo                       | 88-50400-22 | ELISA                    |
| IgG (Total) Human Uncoated ELISA Kit with Plates       | Thermo                       | 88-50550-22 | ELISA                    |
| ELISA Coating Buffer (5X)                              | Biolegend                    | 421701      | ELISA                    |
| Tween-20                                               | sigma                        | P9416       | Western blotting         |
| Blocking Buffer for Fluorescent Western Blotting       | ROCKLAND                     | MB-070      | Western blotting         |
| 3X Blue Loading Buffer                                 | Cell Signaling Technology    | 56036       | Western blotting         |
| 30X Reducing Agent (1.25M DTT)                         | Cell Signaling Technology    | 14265       | Western blotting         |

Abbreviations: FCM: Flow cytometry, IHC: Immunohistochemistry, ELISA: Enzyme-linked immunosorbent assay
